# Supplementary material
Source: PubMed Central journal article supplement (PMC6736649)
Supplement: NIHMS1538466-supplement-1.pdf [file NIHMS1538466-supplement-1.pdf]

**Cell Reports, Volume 28**

**Supplemental Information**

**FEZ1 Is Recruited  
to a Conserved Cofactor Site on Capsid  
to Promote HIV-1 Trafficking**

**Pei-Tzu Huang, Brady James Summers, Chaoyi Xu, Juan R. Perilla, Viacheslav  
Malikov, Mojgan H. Naghavi, and Yong Xiong**

## Supplementary Data

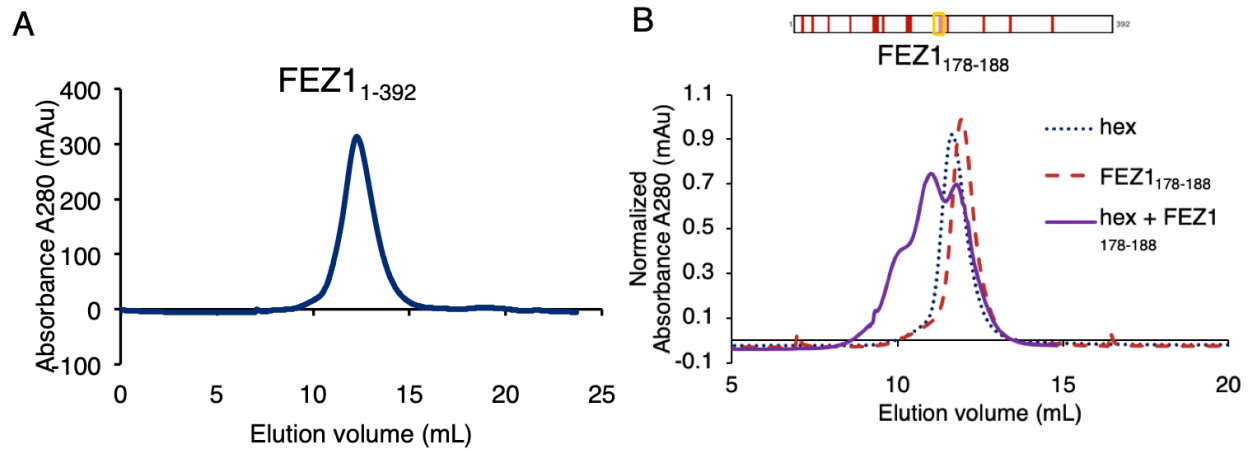

**Fig. S1 Purification of full-length FEZ1<sub>1-392</sub> (A) and co-elution of FEZ1<sub>178-188</sub> with CA hexamer (B) in the SEC binding assay. Related to Figure 1.** Schematic of the FEZ1<sub>178-188</sub> is boxed in yellow and shown on top of the chromatogram in (B). Red bars indicate the negatively-charged residues of FEZ1.

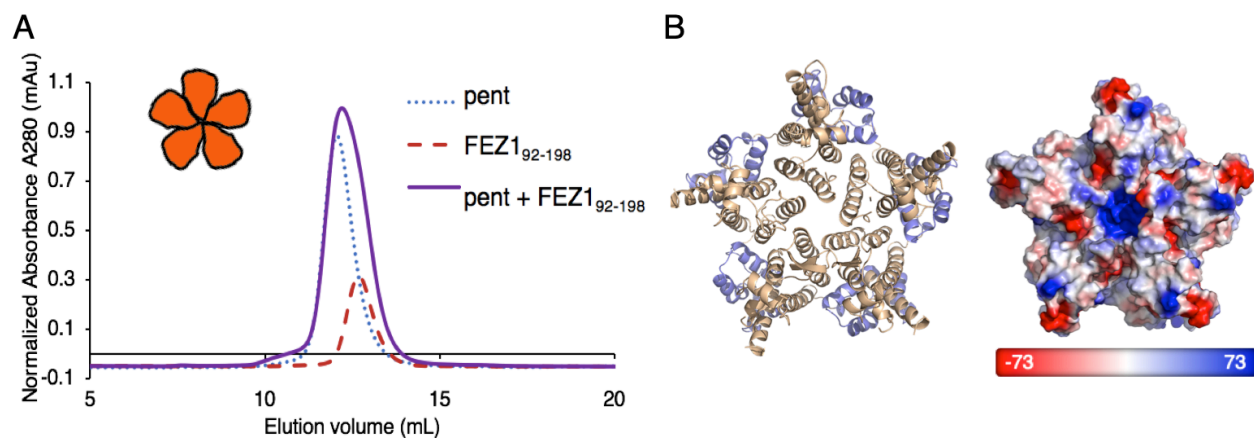

**Fig. S2 (A) Size exclusion chromatography (SEC) binding assay of FEZ1<sub>92-198</sub> with the CA pentamer. Related to Figure 1.** Schematic shown in red cartoon inset. There is no co-elution of FEZ1<sub>92-198</sub> with the CA pentamer. (B) Crystal structure of the CA pentamer (PDBID: 3P05) (left) and its electrostatic potential surface (right). Blue, positive charge; red, negative charge. The unit of the electrostatic potential map is  $k_B T/e$ .

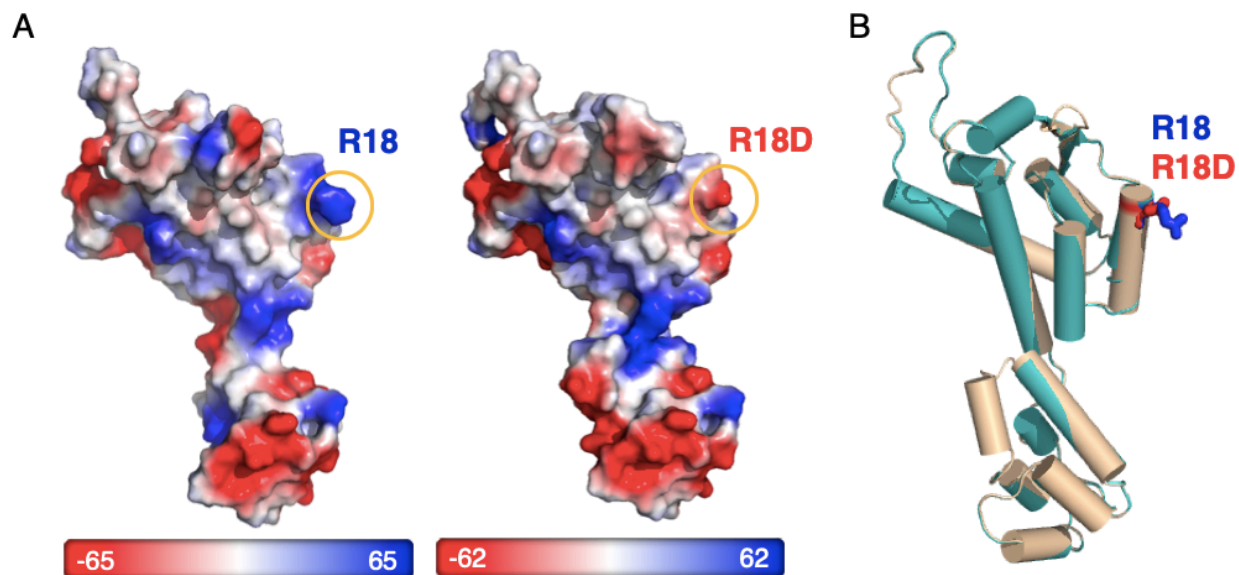

**Fig. S3 Comparison of crystal structures of WT and R18D CA molecules. Related to Figure 3.**

A. Electrostatic potential surface of WT (left) and R18D (right) CA. Blue, positive charge; red, negative charge. The positions of R18 and R18D are marked by orange circles. The unit of the electrostatic potential map is  $k_B T/e$ .

B. Overlay of the two structures WT CA (cyan, PDBID: 3H47) and R18D CA (tan). R18 is in blue and R18D is in red.

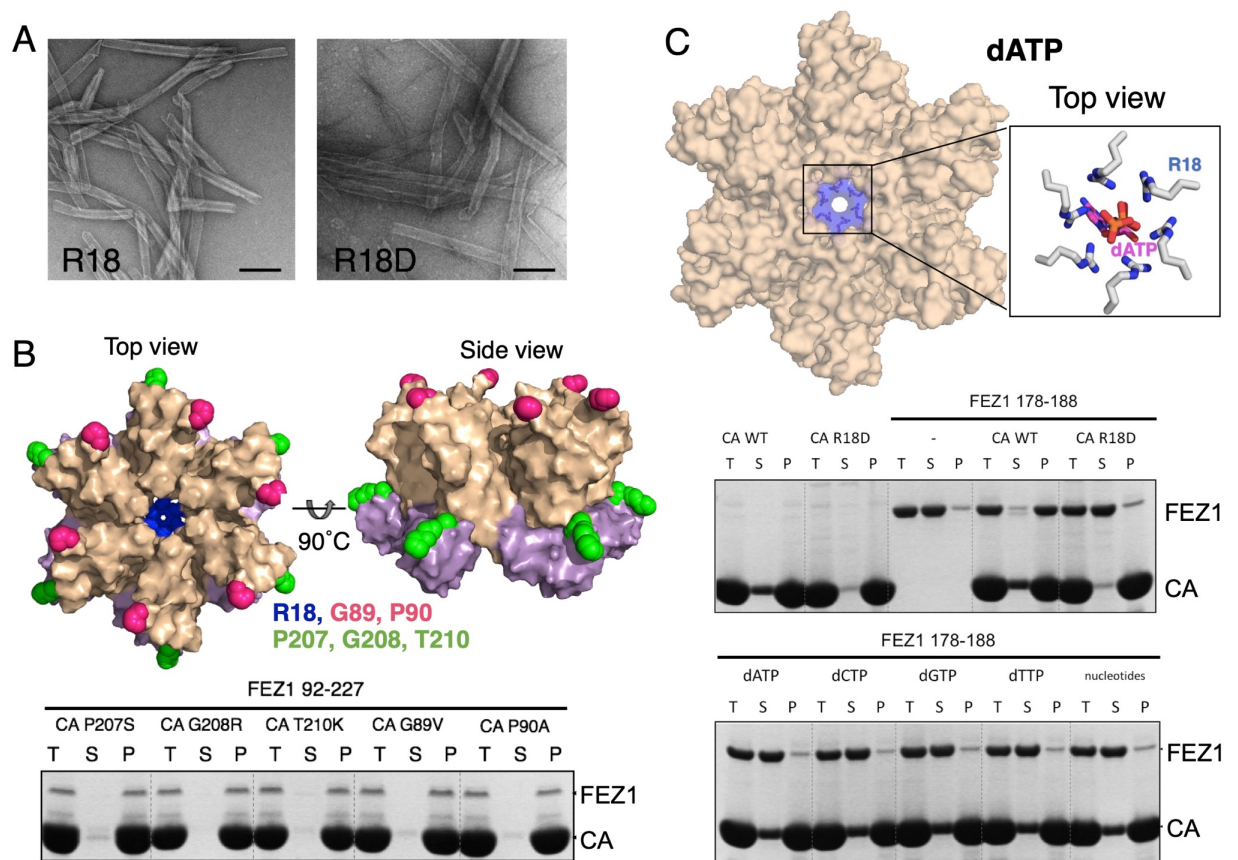

**Fig. S4 Electrostatic interaction is important for FEZ1 binding with CA hexamer. Related to Figure 3.**

A. Negative-stain electron microscopy micrographs of crosslinked CA tubes of WT CA (left) and R18D CA (right). Scale bar, 200 nm.

B. Top: Orthogonal views of the residues that are mutated on the CA hexamer. Green, residues implicated in escaping MxB restriction (P207 G208, T210); Yellow, residues important for CypA binding (G89, P90); R18 is in blue. Bottom: Mutations of the residues important for MxB function or CypA binding do not affect FEZ1 co-pelleting with CA tubes.

C. Top: Schematic of dATP binding with the center R18 residues of the CA hexamer (PDBID: 5HGM). Middle and bottom: Co-pelleting assay showing that the binding of Fez1<sub>178-188</sub> to CA tubes are abolished by R18D mutation of CA (middle) and various dNTPs (bottom), consistent with binding at the CA hexamer center.

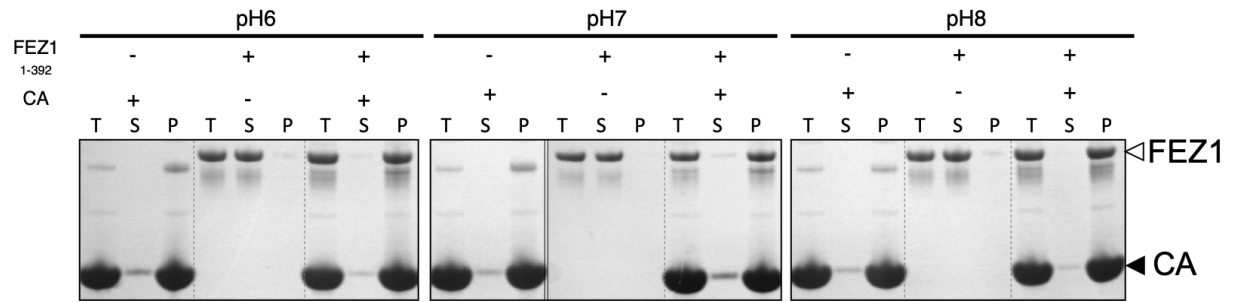

**Figure S5. FEZ1 CA tubes pelleting assay at different buffer pH. Related to Figure 3.**

Under different buffer pHs, pH = 6, 7, 8, FEZ1 all interacts with CA tubes.

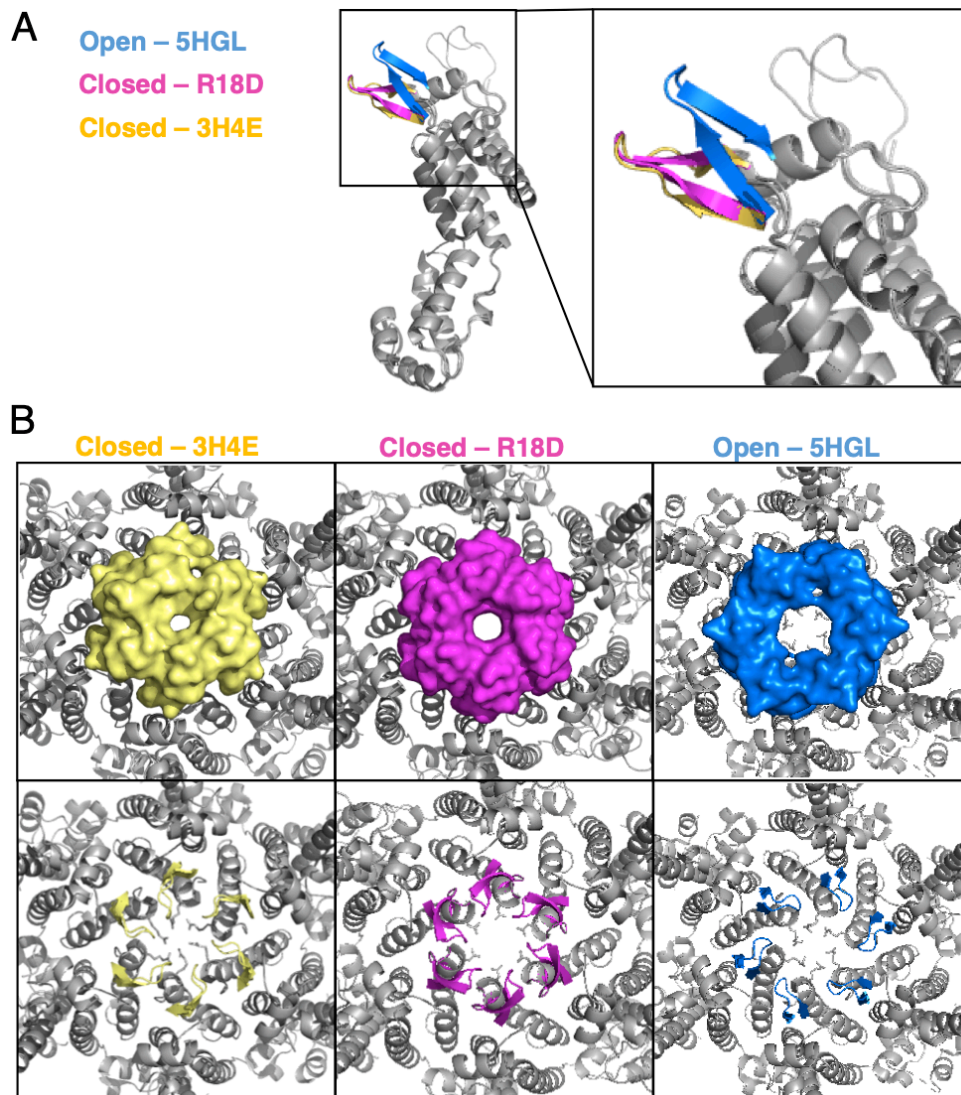

**Fig. S6. Comparison of structures of the WT and R18D CA Hexamers with the open or the closed conformation of the  $\beta$ -hairpin. Related to Figure 3.**

A. Overlay of the two WT CA structures, open (blue, PDBID: 5HGL) and closed (yellow, PDB: 3H4E) forms, and the current R18D CA structure (magenta).

B. Comparison of the open (right) and closed (left)  $\beta$ -hairpin conformations, showing the pore at the center of the CA hexamer. R18 or R18D is shown as stick pointing into the center. The  $\beta$ -hairpin is in surface representation in the top rows and in cartoon representation in the bottom rows.

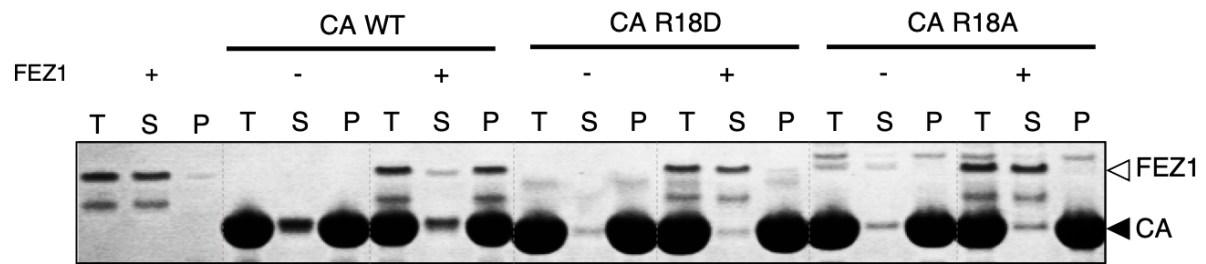

**Figure S7. R18A also reduces interaction of FEZ1 with CA tubes. Related to Figure 3.**

Mutation of the center ring R18 of the capsid to either aspartate or alanine reduced the interaction of FEZ1<sub>92-227</sub> with CA tubes, as compared with the WT CA tubes. See also Figure 3.



**Table S1. Data collection and refinement statistics for the R18D CA crystal structure.****Related to Figure 3.**

Values shown in parentheses are for highest-resolution shell.

|                                        |                           |
|----------------------------------------|---------------------------|
| <b>Data collection</b>                 |                           |
| Space group                            | P6                        |
| <b>Cell dimensions</b>                 |                           |
| <i>a</i> , <i>b</i> , <i>c</i> (Å)     | 90.66, 90.66, 56.58       |
| $\alpha$ , $\beta$ , $\gamma$ (°)      | 90.0, 90.0, 120.0         |
| Resolution (Å)                         | 45.90–2.05 (2.09-2.05)    |
| $R_{\text{sym}}$ or $R_{\text{merge}}$ | 0.134 (1.34)              |
| Mean $I/\sigma I$                      | 12.2 (1.7)                |
| Completeness (%)                       | 99.9                      |
| Redundancy                             | 5.5 (5.1)                 |
| $CC^{1/2}$ (%)                         | 39.7                      |
| <b>Refinement</b>                      |                           |
| Resolution (Å)                         | 2.05                      |
| No. of reflections                     | 15594                     |
| $R_{\text{work}}/R_{\text{free}}$      | 0.174/0.221 (0.241/0.296) |
| <b>No. of atoms</b>                    |                           |
| Protein                                | 1692                      |
| Water                                  | 218                       |
| <b>B-factors</b>                       |                           |
| All atoms (Å <sup>2</sup> )            | 33.0                      |
| <b>R.m.s. deviations</b>               |                           |
| Bond lengths (Å)                       | 0.007                     |
| Bond angles (°)                        | 0.9                       |
| <b>Ramachandran</b>                    |                           |
| Preferred                              | 98.1%                     |
| Allowed                                | 1.9 %                     |
| Outliers                               | 0.0 %                     |

**Table S2. Summary of FEZ1 constructs. [Related to Figures 1-7.](#)**

| Construct                           | Figures          | SEC                                                                                             | CA tube pelleting                                                                                                                                                       | ITC                                           | Infectivity and trafficking                                  |
|-------------------------------------|------------------|-------------------------------------------------------------------------------------------------|-------------------------------------------------------------------------------------------------------------------------------------------------------------------------|-----------------------------------------------|--------------------------------------------------------------|
| FEZ1 <sub>1-392</sub>               | 1B, 3E, 6, S5    |                                                                                                 | Binds CA tubes at physiological concentrations of salt, NTPs/dNTPs and IP6, and at pH 6, 7, or 8. No binding to R18D/R18A CA tubes.                                     |                                               | Functional for HIV-1 infectivity and virus core trafficking. |
| FEZ1 <sub>1-92</sub>                | 1B, 4A           | Does not bind CA hexamer                                                                        | Binds CA tubes at 50 mM but not at 150 mM NaCl. No binding to R18D CA tubes.                                                                                            |                                               |                                                              |
| FEZ1 <sub>92-158</sub>              | 2B               | Does not bind CA hexamer                                                                        | Reduced binding to CA tubes with increasing salt concentrations.                                                                                                        |                                               |                                                              |
| FEZ1 <sub>92-198</sub>              | 1B-H, 2F, 2G, S2 | Binds CA hexamer, but not CA, 1/3- or 1/2-hexamer, pentamer, or 3-fold inter-hexamer interface. | Binds CA tubes at both 50mM and 150 mM NaCl. No binding to R18D CA tubes.                                                                                               | Binds CA hexamer at Kd ~300±60 nM             |                                                              |
| FEZ1 <sub>92-198</sub><br>182-186EA | 2F, 2H           |                                                                                                 |                                                                                                                                                                         | Binds CA hexamer at Kd ~2.5±0.3 μM            |                                                              |
| FEZ1 <sub>158-198</sub>             | 2C               | Binds CA hexamer                                                                                |                                                                                                                                                                         |                                               |                                                              |
| FEZ1 <sub>158-198</sub><br>182EA    | 2E               | Reduced binding to CA hexamer                                                                   |                                                                                                                                                                         |                                               |                                                              |
| FEZ1 <sub>158-182</sub>             | 2D               | Does not bind CA hexamer                                                                        |                                                                                                                                                                         |                                               |                                                              |
| FEZ1 <sub>178-188</sub>             | 2F, 2I, 3E       |                                                                                                 | Greatly reduced binding to CA tubes in the presence of 20 μM ATP, IP6, and nucleotides.                                                                                 | Strong binding to CA hexamer at Kd ~190±40 nM |                                                              |
| FEZ1 <sub>92-227</sub>              | 3C, 3D, S4B      | Binds CA hexamer, greatly reduced binding to R18D CA hexamer                                    | Binds CA tubes, but not with R18D tubes. Reduced binding to CA tubes with increasing salt concentrations. Binds CA tubes with CypA-and MxB-binding defective mutations. |                                               |                                                              |
| FEZ1 <sub>198-392</sub>             | 1B,              | Does not bind CA hexamer                                                                        | Binds CA tubes at 50 mM but not at 150 mM NaCl. No binding to R18D CA tubes.                                                                                            |                                               |                                                              |
| FEZ1 <sub>1-392</sub><br>178-188EA  | 6A, 6C           |                                                                                                 |                                                                                                                                                                         |                                               | Modest reduction in infectivity, no effect on trafficking    |
| FEZ1 <sub>1-392</sub><br>158-198EA  | 6B, 6D, 6E       |                                                                                                 |                                                                                                                                                                         |                                               | Significant defects in infectivity and trafficking           |
